# Supplementary material for: Rapid synthesis of high-areal-capacitance ultrathin hexagon Fe2O3 nanoplates on carbon cloth via a versatile molten salt method
Source: Royal Society of Chemistry journal article supplement (doi:10.1039/d0qm00410c), 2020-01-01
Supplement: d0qm00410c1.pdf [file d0qm00410c1.pdf]

Electronic Supplementary Information

**Rapid synthesis of high-areal-capacitance ultrathin hexagon  
Fe<sub>2</sub>O<sub>3</sub> nanoplates on carbon cloth via a versatile molten salt  
method**

Yi-Jie Gu<sup>a</sup>, Wei Wen<sup>b</sup>, Shilie Zheng<sup>c</sup> and Jin-Ming Wu<sup>\*a</sup>

<sup>a</sup> State Key Laboratory of Silicon Materials and School of Materials Science and Engineering, Zhejiang University, Hangzhou 310027, P. R. China.

<sup>b</sup> College of Mechanical and Electrical Engineering, Hainan University, Haikou 570228, P. R. China.

<sup>c</sup> College of Information Science and Electronic Engineering, Zhejiang University, Hangzhou 310027, P. R. China.

\* Corresponding author

Name: Jin-Ming Wu

E-mail: msewjm@zju.edu.cn

Affiliation: State Key Laboratory of Silicon Materials, Zhejiang University

Contact address: Hangzhou 310027, PR China

## Calculation

For MO@CC electrodes, the areal ( $C_s$ ,  $\text{mF cm}^{-2}$ ) and gravimetric ( $C_m$ ,  $\text{F g}^{-1}$ ) capacitances are calculated from the corresponding CV curves at different scan rates according to following equations (1) and (2), respectively,

$$C_s = \frac{\int idV}{S \times \nu \times \Delta V} \quad (1)$$

$$C_m = \frac{\int idV}{m \times \nu \times \Delta V} \quad (2)$$

where  $\int idV$  is the area of CV curve,  $\Delta V$  is the potential window (V),  $\nu$  is the scan rate ( $\text{mV s}^{-1}$ ),  $S$  is the working area ( $1 \text{ cm}^2$ ), and  $m$  is the mass density (Table S1,  $\text{mg cm}^{-2}$ ).

For supercapacitors, the areal capacitance ( $C$ ,  $\text{mF cm}^{-2}$ ), energy density ( $E$ ,  $\mu\text{Wh cm}^{-3}$ ) and power density ( $P$ ,  $\text{mW cm}^{-3}$ ) are calculated from GCD curves at different current densities according to equations (3)–(5),

$$C = \frac{I \times \Delta t}{S \times \Delta V} \quad (3)$$

$$E = \frac{C \times \Delta V^2}{2 \times d} \quad (4)$$

$$P = \frac{E}{\Delta t} \quad (5)$$

where  $I$  is the charge/discharge current (mA),  $S$  is the working area of electrodes (*ca.*  $1 \text{ cm}^2$ ),  $\Delta V$  is the potential window (V) during the discharge process (excluding IR drop),  $d$  is the thickness of the device ( $0.2 \text{ cm}$ ), and  $\Delta t$  is the discharge time (s).

For the electro-kinetic study, the power law equation (6) can be used to determine  $a$  and  $b$  values by taking the current vs. voltage response of the electrode active material at various scan rates,<sup>1</sup>

$$i = av^b \quad (6)$$

where  $i$  and  $v$  are the peak current and the scan rate for the CV measurements, respectively. For a redox reaction limited by a semi-infinite diffusion,  $b = 0.5$ ; for a capacitive process that corresponds to fast faradic surface controlled energy storage behaviour,  $b = 1$ .

The total current  $i$  measured at a specific voltage can be separated into two segments which are capacitive ( $k_1v$ ) and diffusive contribution ( $k_2v^{0.5}$ ), using the following equation (7),<sup>2</sup>

$$i = k_1v + k_2v^{0.5} \quad (7).$$

**Table S1.** Mass loading of Fe<sub>2</sub>O<sub>3</sub> for *x*-Fe<sub>2</sub>O<sub>3</sub>@CC (*x* = 0.3, 0.6, 0.9 and 1.2 mmol).

| Samples                                | Mass loading of Fe <sub>2</sub> O <sub>3</sub> (mg cm <sup>-2</sup> ) |
|----------------------------------------|-----------------------------------------------------------------------|
| 0.3-Fe <sub>2</sub> O <sub>3</sub> @CC | 1.18                                                                  |
| 0.6-Fe <sub>2</sub> O <sub>3</sub> @CC | 1.89                                                                  |
| 0.9-Fe <sub>2</sub> O <sub>3</sub> @CC | 3.33                                                                  |
| 1.2-Fe <sub>2</sub> O <sub>3</sub> @CC | 4.70                                                                  |

**Table S2.** Comparison in the electrochemical performance of the Fe<sub>2</sub>O<sub>3</sub>-based electrodes in aqueous electrolytes.

| Material                                                 | Electrolyte                         | Potential       | Scan rate/<br>Current      | Capacity                         | Ref.        |
|----------------------------------------------------------|-------------------------------------|-----------------|----------------------------|----------------------------------|-------------|
| Fe <sub>2</sub> O <sub>3</sub> nanoneedles<br>on Ni NTAs | 1 M Na <sub>2</sub> SO <sub>4</sub> | -0.8-0 V        | 10 mV s <sup>-1</sup>      | 418.0 F g <sup>-1</sup>          | 3           |
| α-Fe <sub>2</sub> O <sub>3</sub> /PPy                    | 1 M Na <sub>2</sub> SO <sub>4</sub> | -0.8-0 V        | 0.5 mA cm <sup>-2</sup>    | 382.4 mF cm <sup>-2</sup>        | 4           |
| α-Fe <sub>2</sub> O <sub>3</sub> @PANI<br>nanowires      | 1 M Na <sub>2</sub> SO <sub>4</sub> | -0.8-0 V        | 0.5 mA cm <sup>-2</sup>    | 103.0 mF cm <sup>-2</sup>        | 5           |
| Fe <sub>2</sub> O <sub>3</sub> nanocrystals              | 1 M Na <sub>2</sub> SO <sub>4</sub> | -0.2-1 V        | 2 mA cm <sup>-2</sup>      | 1660 mF cm <sup>-2</sup>         | 6           |
| GF/H-Fe <sub>2</sub> O <sub>3</sub><br>nanoplates        | 3 M KOH                             | -1-0 V          | 1 mA cm <sup>-2</sup>      | 694.0 mF cm <sup>-2</sup>        | 7           |
| Ti-doped<br>Fe <sub>2</sub> O <sub>3</sub> @PEDOT        | 5 M LiCl                            | -0.8-0 V        | 1 mA cm <sup>-2</sup>      | 1150.0 mF cm <sup>-2</sup>       | 8           |
| Fe <sub>2</sub> O <sub>3</sub> /graphene                 | 1 M KOH                             | -1.05- -0.3V    | 2 A g <sup>-1</sup>        | 908.0 F g <sup>-1</sup>          | 9           |
| Fe <sub>2</sub> O <sub>3</sub> nanotubes                 | 5 M LiCl                            | -0.8-0V         | 1 mA cm <sup>-2</sup>      | 180.4 mF cm <sup>-2</sup>        | 10          |
| α-Fe <sub>2</sub> O <sub>3</sub> nanorods                | 3 M LiCl                            | -0.8-0 V        | 0.5 mA cm <sup>-2</sup>    | 382.7 mF cm <sup>-2</sup>        | 11          |
| α-Fe <sub>2</sub> O <sub>3</sub> @NiO                    | 1 M LiOH                            | -0.2-0.8V       | 1 mA cm <sup>-2</sup>      | 557.0 mF cm <sup>-2</sup>        | 12          |
| <b>0.3-Fe<sub>2</sub>O<sub>3</sub>@CC</b>                |                                     |                 |                            | <b>1754.9 mF cm<sup>-2</sup></b> |             |
| <b>0.6-Fe<sub>2</sub>O<sub>3</sub>@CC</b>                | <b>6M KOH</b>                       | <b>-1.0-0 V</b> | <b>2 mV s<sup>-1</sup></b> | <b>1762.7 mF cm<sup>-2</sup></b> | <b>This</b> |
| <b>0.9-Fe<sub>2</sub>O<sub>3</sub>@CC</b>                |                                     |                 |                            | <b>4175.7 mF cm<sup>-2</sup></b> | <b>work</b> |
| <b>1.2-Fe<sub>2</sub>O<sub>3</sub>@CC</b>                |                                     |                 |                            | <b>3339.0 mF cm<sup>-2</sup></b> |             |

Abbreviations in Table S2

**NTAs**: nanotube arrays, **PPy**: polypyrrole, **PANI**: polyaniline, **GF**: graphene foam, **H**: hydrogenated, **PEDOT**: 3,4-ethylenedioxythiophene.

## REFERENCES

- 1 Z. H. Huang, Y. Song, D. Y. Feng, Z. Sun, X. Q. Sun and X. X. Liu, High mass loading MnO<sub>2</sub> with hierarchical nanostructures for supercapacitors, *ACS Nano*, 2018, **12**, 3557–3567.
- 2 J. B. Cook, H. S. Kim, T. C. Lin, C. H. Lai, B. Dunn and S. H. Tolbert, Pseudocapacitive charge storage in thick composite MoS<sub>2</sub> nanocrystal-based electrodes, *Adv. Energy Mater.*, 2017, **7**, 1601283–1601295.
- 3 Y. Li, J. Xu, T. Feng, Q. F. Yao, J. P. Xie and H. Xia, Fe<sub>2</sub>O<sub>3</sub> nanoneedles on ultrafine nickel nanotube arrays as efficient anode for high-performance asymmetric supercapacitors, *Adv. Funct. Mater.*, 2017, **27**, 1606728–1606738.
- 4 L. B. Wang, H. L. Yang, X. X. Liu, R. Zeng, M. Li, Y. H. Huang and X. L. Hu, Constructing hierarchical tectorum-like alpha-Fe<sub>2</sub>O<sub>3</sub>/PPy nanoarrays on carbon cloth for solid-state asymmetric supercapacitors, *Angew. Chem. Int. Ed.*, 2017, **56**, 1105–1110.
- 5 X. F. Lu, X. Y. Chen, W. Zhou, Y. X. Tong and G. R. Li,  $\alpha$ -Fe<sub>2</sub>O<sub>3</sub>@PANI core-shell nanowire arrays as negative electrodes for asymmetric supercapacitors, *ACS Appl. Mater. Interfaces*, 2015, **7**, 14843–14850.
- 6 S. M. Peng, L. Yu, B. Lan, M. Sun, G. Cheng, S. H. Liao, H. Cao and Y. L. Deng, Low-cost superior solid-state symmetric supercapacitors based on hematite nanocrystals, *Nanotechnology*, 2016, **27**, 505404–505416.
- 7 K. Chi, Z. Y. Zhang, Q. Y. Lv, C. Y. Xie, J. Xiao, F. Xiao and S. Wang, Well-ordered oxygen-deficient CoMoO<sub>4</sub> and Fe<sub>2</sub>O<sub>3</sub> nanoplate arrays on 3D graphene foam: Toward flexible asymmetric supercapacitors with enhanced capacitive properties, *ACS Appl. Mater. Interfaces*, 2017, **9**, 6044–6053.
- 8 Y. X. Zeng, Y. Han, Y. T. Zhao, Y. Zeng, M. H. Yu, Y. J. Liu, H. L. Tang, Y. X. Tong and X. H. Lu, Advanced Ti-doped Fe<sub>2</sub>O<sub>3</sub>@PEDOT core/shell anode for

- high-energy asymmetric supercapacitors, *Adv. Energy Mater.*, 2015, **5**, 1402176–1402183.
- 9 H. W. Wang, Z. J. Xu, H. Yi, H. G. Wei, Z. H. Guo and X. F. Wang, One-step preparation of single-crystalline Fe<sub>2</sub>O<sub>3</sub> particles/graphene composite hydrogels as high performance anode materials for supercapacitors, *Nano Energy*, 2014, **7**, 86–96.
- 10 P. H. Yang, Y. Ding, Z. Y. Lin, Z. W. Chen, Y. Z. Li, P. F. Qiang, M. Ebrahimi, W. J. Mai, C. P. Wong and Z. L. Wang, Low-cost high-performance solid-state asymmetric supercapacitors based on MnO<sub>2</sub> nanowires and Fe<sub>2</sub>O<sub>3</sub> nanotubes, *Nano Lett.*, 2014, **14**, 731-736.
- 11 X. H. Lu, Y. X. Zeng, M. H. Yu, T. Zhai, C. L. Liang, S. L. Xie, M. S. Balogun and Y. X. Tong, Oxygen-deficient hematite nanorods as high-performance and novel negative electrodes for flexible asymmetric supercapacitors, *Adv. Mater.*, 2014, **26**, 3148–3155.
- 12 Y. Jiao, Y. Liu, B. Yin, S. W. Zhang, F. Y. Qu and X. Wu, Hybrid  $\alpha$ -Fe<sub>2</sub>O<sub>3</sub>@NiO heterostructures for flexible and high performance supercapacitor electrodes and visible light driven photocatalysts, *Nano Energy*, 2014, **10**, 90–98.

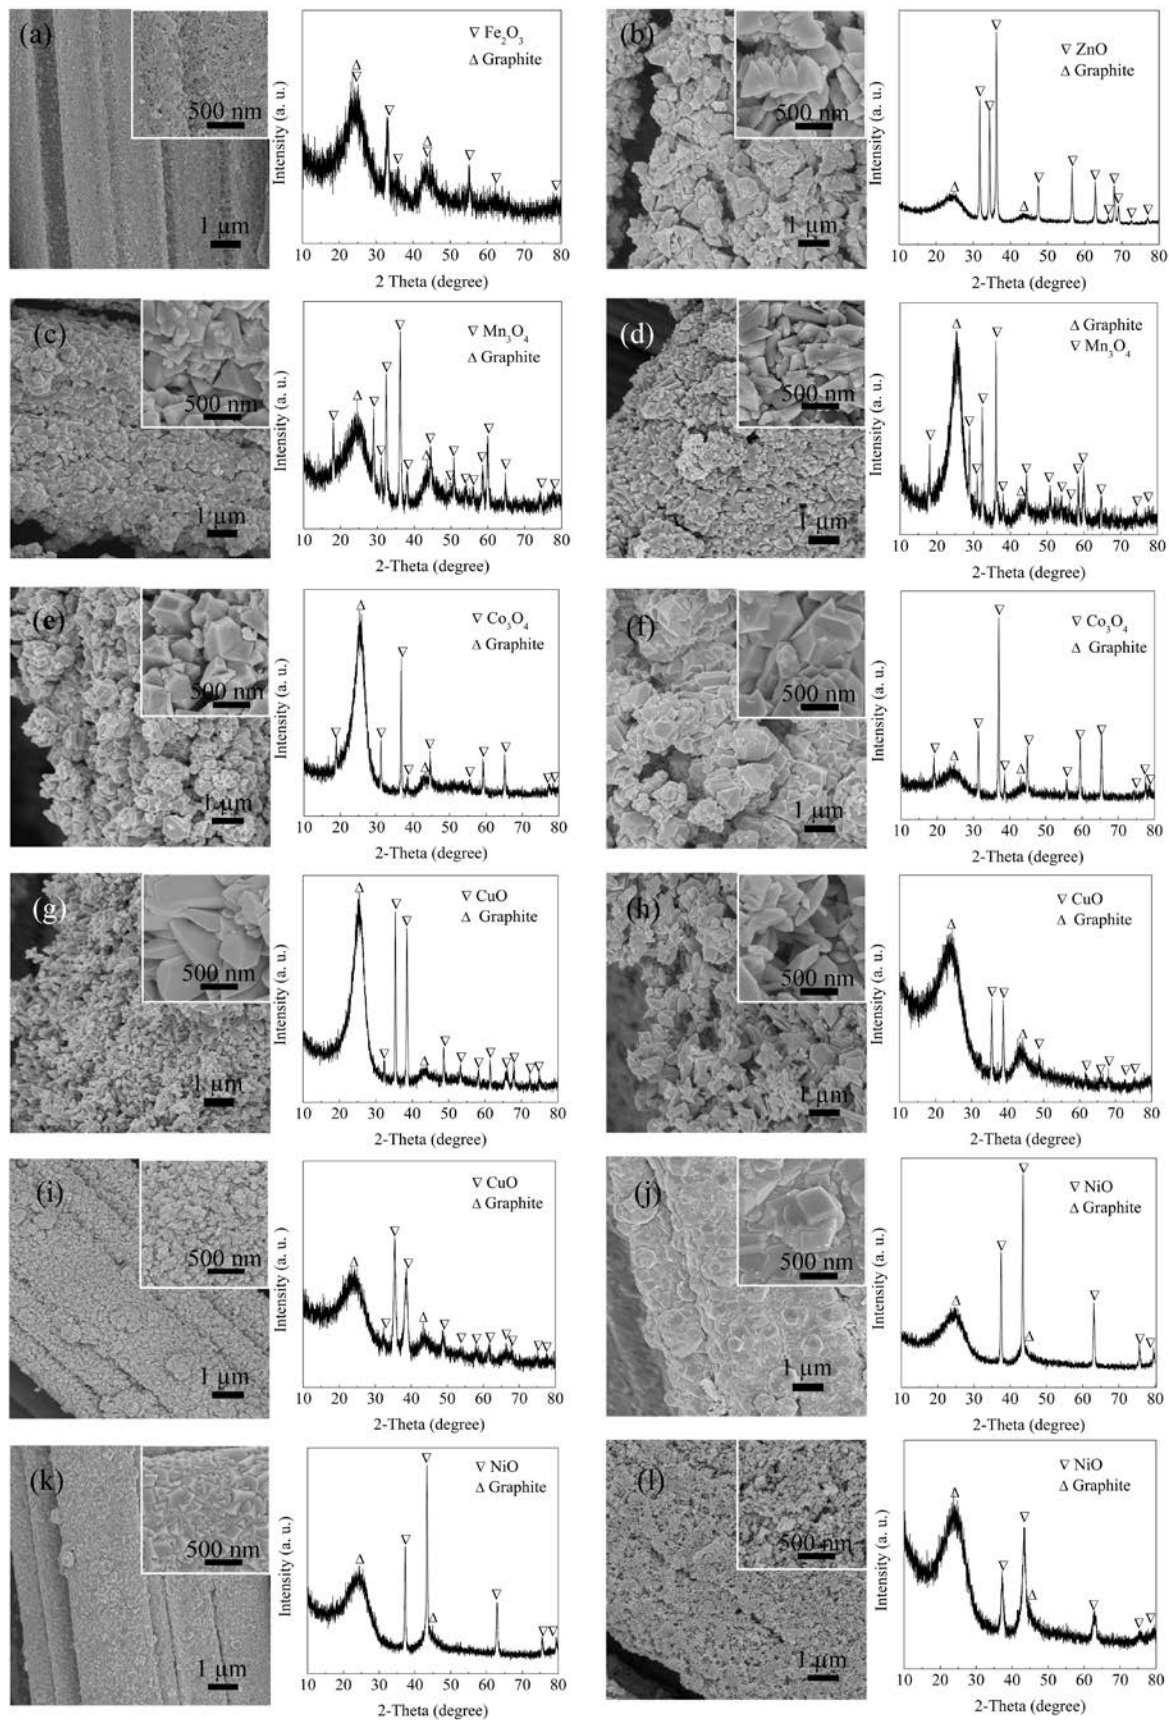



**Figure S1.** FESEM images (left) and XRD patterns (right) of MOs/CC. (a)  $\text{Fe}_2\text{O}_3$ @CC obtained using  $\text{Fe}_2(\text{SO}_4)_3$ ; (b)  $\text{ZnO}$ @CC obtained using  $\text{ZnSO}_4$ ;  $\text{Mn}_3\text{O}_4$ @CC obtained using (c)  $\text{MnCl}_2$  and (d)  $\text{MnSO}_4$ , respectively;  $\text{Co}_3\text{O}_4$ @CC samples obtained using (e)  $\text{Co}(\text{NO}_3)_2$  and (f)  $\text{CoCl}_2$ , respectively;  $\text{CuO}$ @CC obtained using (g)  $\text{Cu}(\text{NO}_3)_2$ , (h)  $\text{CuCl}_2$  and (i)  $\text{CuSO}_4$ , respectively;  $\text{NiO}$ @CC obtained using (j)  $\text{Ni}(\text{NO}_3)_2$ , (k)  $\text{NiCl}_2$  and (l)  $\text{NiSO}_4$ , respectively.

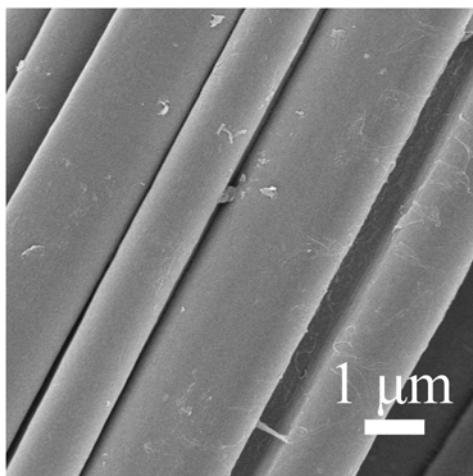

**Figure S2.** FESEM image of blank carbon cloth substrate.

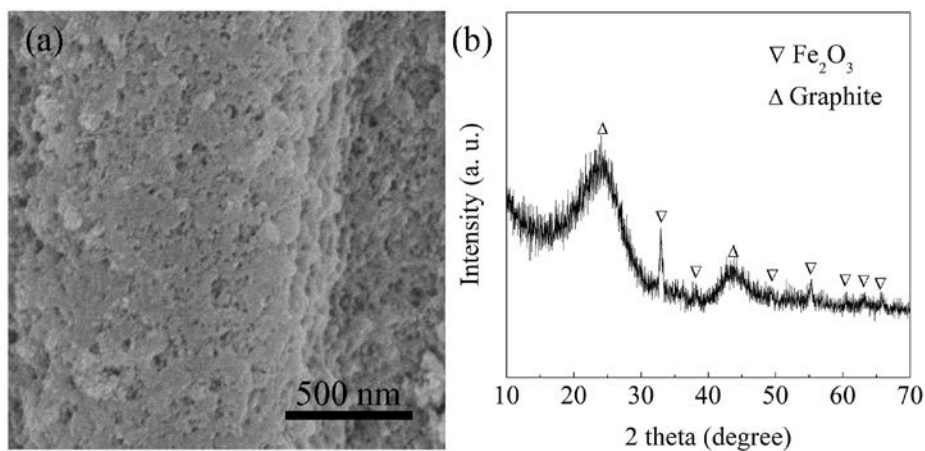

**Figure S3.** (a) FESEM image and (b) XRD pattern of the  $\text{Fe}_2\text{O}_3$ @CC obtained using 2.5 g  $\text{NaNO}_3$  and 0.3 mmol  $\text{FeCl}_3$ .

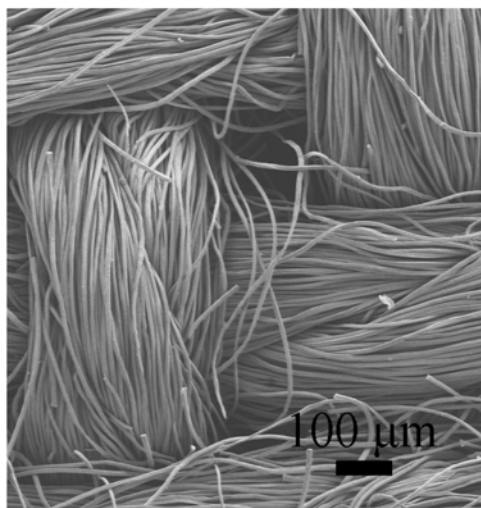

**Figure S4.** FESEM images of the 0.9-Fe<sub>2</sub>O<sub>3</sub>@CC electrode.

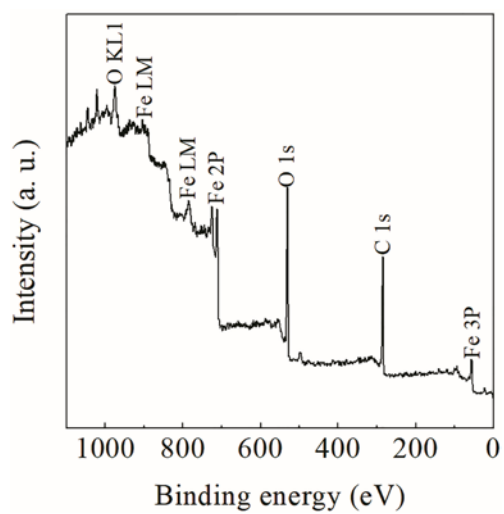

**Figure S5.** Full scan XPS spectrum of the 0.9-Fe<sub>2</sub>O<sub>3</sub>@CC electrode.

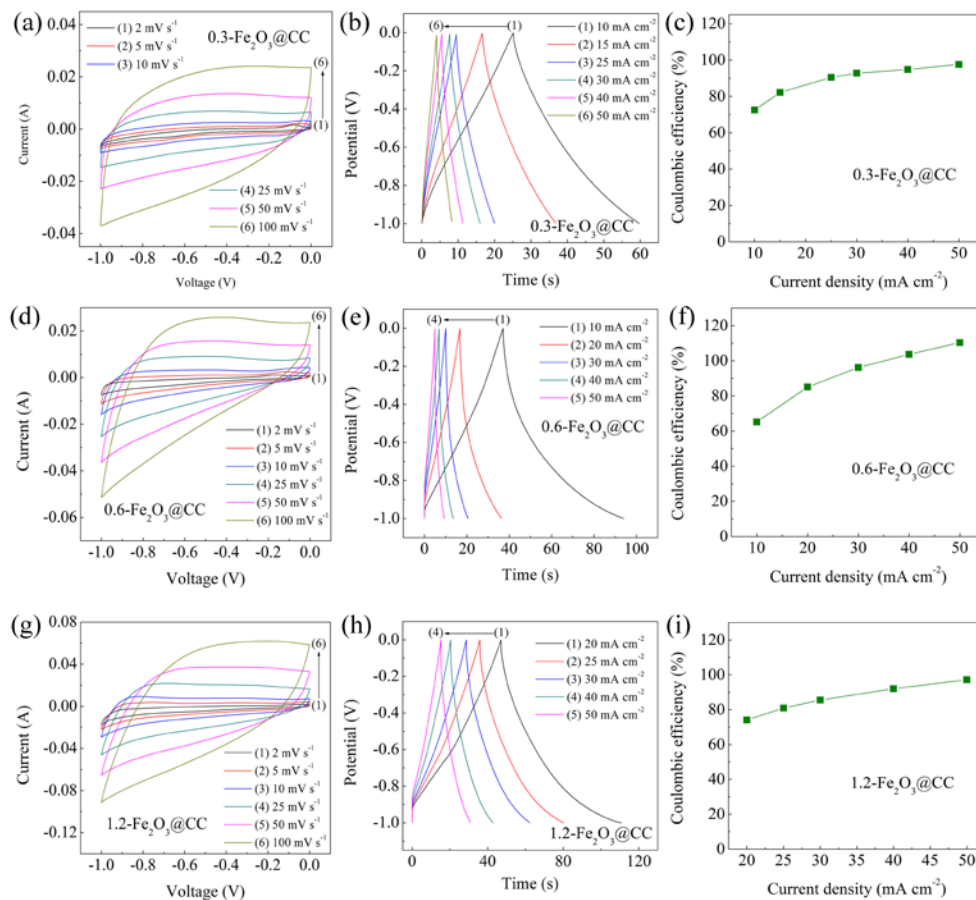

**Figure S6.** (a, d and g) CV curves at various scan rates, (b, e and h) GCD curves at different current densities and (c, f and i) coulombic efficiencies of the 0.3-Fe<sub>2</sub>O<sub>3</sub>@CC, 0.6-Fe<sub>2</sub>O<sub>3</sub>@CC and 1.2-Fe<sub>2</sub>O<sub>3</sub>@CC, respectively.

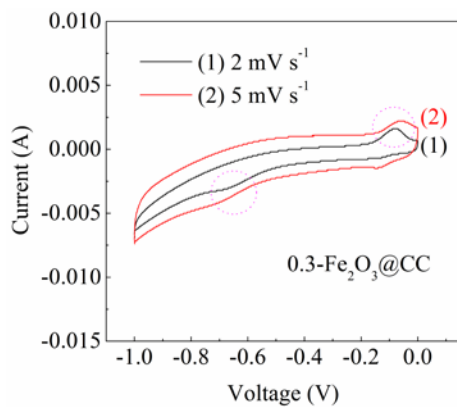

**Figure S7.** CV curves of the 0.3-Fe<sub>2</sub>O<sub>3</sub>@CC electrode at scan rates of 2 and 5 mV s<sup>-1</sup>.

The circled region shows the redox peaks.

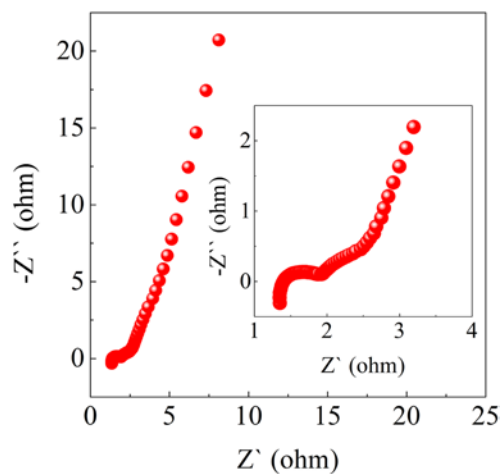

**Figure S8.** The Nyquist plots of the 0.9-Fe<sub>2</sub>O<sub>3</sub>@CC electrode. The inset is the enlarged plots at high frequency.

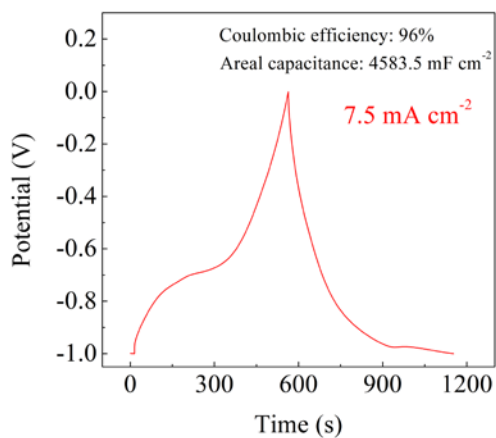

**Figure S9.** The GCD curve of the 0.9-Fe<sub>2</sub>O<sub>3</sub>@CC electrode at a current density of 7.5 mA cm<sup>-2</sup>. The areal capacitance is 4583.5 mF cm<sup>-2</sup>. The coulombic efficiency is ca. 96%.

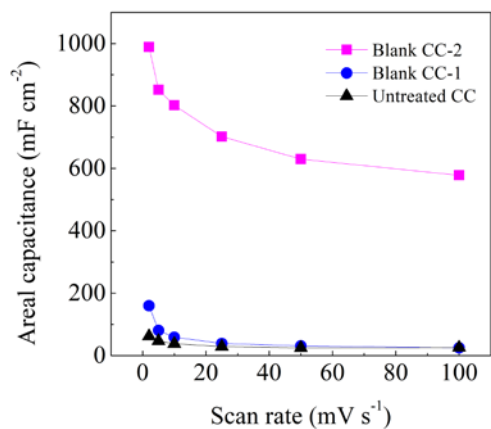

**Figure S10.** Areal capacitances of the untreated CC, the blank CC-1 and the blank CC-2 electrodes within -1–0 V in 6M KOH electrolyte.

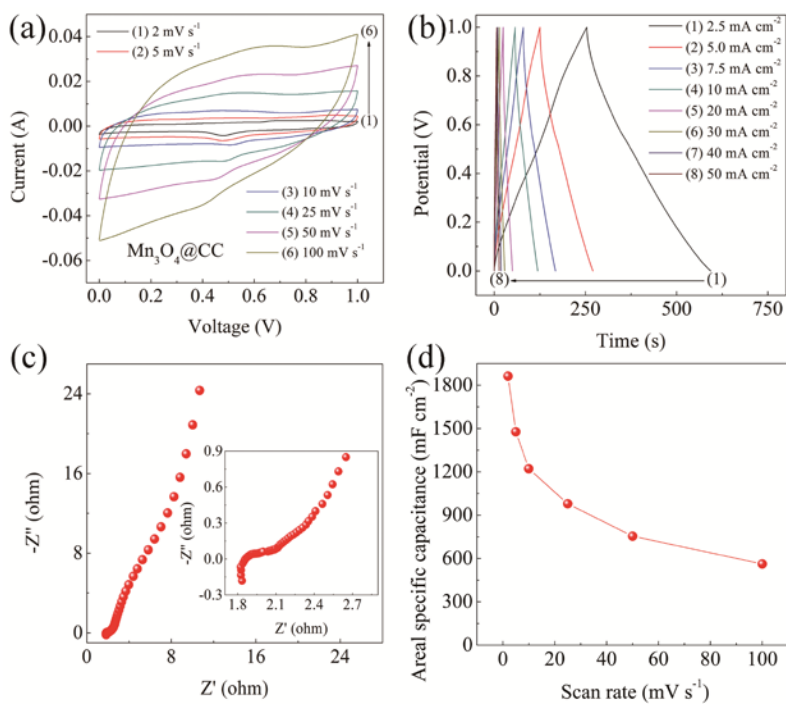

**Figure S11.** (a) CV and (b) GCD curves of the Mn<sub>3</sub>O<sub>4</sub>@CC electrode at different scan rates and current densities, respectively. (c) the Nyquist plots; the inset is the enlarged plots at high frequency. (d) Areal specific capacitance at different scan rates.
